# Supplementary material for: Associations between Consumption of Dietary Fibers and the Risk of Type 2 Diabetes, Hypertension, Obesity, Cardiovascular Diseases, and Mortality in Chinese Adults: Longitudinal Analyses from the China Health and Nutrition Survey
Source: MDPI journal article supplement (doi:10.3390/nu14132650), 2022-06-27
Supplement: s1 [file s1]

**Table S1** Characteristics of the study population at inclusion in the hypertension cohort, according to quartiles of total dietary fiber intakes.

| Characteristics                  | Fiber intake (g/d)    |                        |                         |                         | <i>p</i> |
|----------------------------------|-----------------------|------------------------|-------------------------|-------------------------|----------|
|                                  | Quartile 1 (<6.26)    | Quartile 2 (6.26-8.84) | Quartile 3 (8.84-13.66) | Quartile 4 (>13.66)     |          |
| Number                           | 877                   | 954                    | 1005                    | 1002                    |          |
| Age (years)                      | 44.17 ± 12.84         | 44.07 ± 11.90          | 44.90 ± 12.26           | 45.35 ± 12.21           | 0.068    |
| Male, n (%)                      | 364 (42.62)           | 433 (45.68)            | 474 (47.49)             | 507 (50.75)             | 0.005    |
| BMI (kg/m <sup>2</sup> )         | 22.46 ± 2.95          | 22.53 ± 3.08           | 22.79 ± 3.01            | 22.77 ± 3.16            | 0.045    |
| Waist circumference(cm)          | 78.14 ± 8.89          | 78.91 ± 9.08           | 79.54 ± 8.91            | 80.05 ± 9.22            | <0.001   |
| Systolic blood pressure (mm Hg)  | 115.12 ± 11.61        | 115.00 ± 10.53         | 114.39 ± 11.55          | 115.00 ± 11.21          | 0.519    |
| Diastolic blood pressure (mm Hg) | 75.19 ± 7.78          | 75.25 ± 7.51           | 74.06 ± 8.18            | 74.66 ± 7.96            | 0.005    |
| Physical activity (MET-MIN/day)  | 587.57 (0.00-1645.71) | 1131.43 (0.00-2132.14) | 1225.71 (0.00-2255.14)  | 1325.04 (16.50-2468.57) | <0.001   |
| Smoking, n (%)                   |                       |                        |                         |                         |          |
| Yes                              | 244 (28.67)           | 317 (33.37)            | 343 (34.27)             | 339 (33.93)             | 0.041    |
| No                               | 607 (71.33)           | 633 (66.63)            | 658 (65.73)             | 660 (66.07)             |          |
| Alcohol drinking, n (%)          |                       |                        |                         |                         |          |
| Yes                              | 226 (33.37)           | 317 (36.87)            | 368 (36.06)             | 361 (36.06)             | <0.001   |
| No                               | 626 (66.63)           | 633 (63.13)            | 630 (63.94)             | 640 (63.94)             |          |
| Educational level, n (%)         |                       |                        |                         |                         |          |
| Primary school or below          | 329 (38.52)           | 395 (41.67)            | 455 (45.64)             | 497 (49.75)             | 0.001    |
| Junior high school               | 316 (37.00)           | 346 (36.50)            | 358 (35.91)             | 311 (31.13)             |          |
| Senior high school               | 134 (15.69)           | 136 (14.35)            | 112 (11.23)             | 130 (13.01)             |          |
| College and above                | 75 (8.78)             | 71 (7.49)              | 72 (7.22)               | 61 (6.11)               |          |
| Regions, n (%)                   |                       |                        |                         |                         |          |
| Urban                            | 289 (32.95)           | 263 (27.57)            | 265 (26.37)             | 219 (21.86)             | <0.001   |
| Rural                            | 588 (67.05)           | 691 (72.43)            | 740 (73.630)            | 783 (78.14)             |          |
| Total energy intake (kcal/day)   | 1895.94 ± 531.12      | 2136.44 ± 531.85       | 2307.63 ± 564.51        | 2512.07 ± 590.30        | <0.001   |

|                                 |                        |                        |                        |                        |        |
|---------------------------------|------------------------|------------------------|------------------------|------------------------|--------|
| Total carbohydrate intake (g/d) | 272.23 ± 81.08         | 320.93 ± 83.49         | 347.35 ± 101.19        | 386.09 ± 108.81        | <0.001 |
| Total protein intake (g/d)      | 55.69 ± 17.67          | 62.49 ± 18.48          | 69.87 ± 19.61          | 77.59 ± 24.28          | <0.001 |
| Total fatty intake (g/d)        | 63.29 ± 32.71          | 64.52 ± 33.57          | 67.41 ± 33.94          | 70.44 ± 36.98          | <0.001 |
| Na intake (mg/d)                | 189.41 (108.91-343.23) | 266.23 (151.96-525.92) | 362.54 (172.49-766.27) | 375.73 (179.55-799.16) | <0.001 |
| Whole-grain fiber intake (g/d)  | 0.38 ± 0.80            | 0.71 ± 1.28            | 1.18 ± 1.99            | 2.52 ± 5.70            | <0.001 |
| Legume fiber intake (g/d)       | 0.11 ± 0.31            | 0.34 ± 0.76            | 0.77 ± 1.55            | 2.55 ± 5.57            | <0.001 |
| Vegetable fiber intake (g/d)    | 2.02 ± 0.96            | 3.38 ± 1.33            | 4.83 ± 2.37            | 11.09 ± 9.87           | <0.001 |
| Fruit fiber intake (g/d)        | 0.08 ± 0.31            | 0.18 ± 0.54            | 0.37 ± 0.93            | 0.47 ± 1.37            | <0.001 |

Descriptive analyses of continuous variables were conducted by means ± standard deviations (SD) or medians (interquartile range), and categorical variables were described by number (percentage). Analysis of variance or Kruskal-Wallis test was used for continuous variables, and chi square test was used for categorical variables. BMI: body mass index.

**Table S2 Characteristics of the study population at inclusion in the obesity cohort, according to quartiles of total dietary fiber intakes.**

| Characteristics                  | Fiber intake (g/d)    |                        |                         |                        | <i>p</i> |
|----------------------------------|-----------------------|------------------------|-------------------------|------------------------|----------|
|                                  | Quartile 1 (<6.20)    | Quartile 2 (6.20-8.82) | Quartile 3 (8.82-13.54) | Quartile 4 (>13.54)    |          |
| Number                           | 917                   | 1028                   | 1099                    | 1071                   |          |
| Age (years)                      | 46.75 ± 12.88         | 46.32 ± 12.29          | 46.72 ± 12.31           | 47.31 ± 12.33          | 0.336    |
| Male, n (%)                      | 372 (41.56)           | 472 (46.18)            | 530 (48.53)             | 538 (50.42)            | 0.001    |
| BMI (kg/m <sup>2</sup> )         | 22.45 ± 2.63          | 22.34 ± 2.63           | 22.66 ± 2.62            | 22.57 ± 2.59           | 0.037    |
| Waist circumference (cm)         | 78.60 ± 9.01          | 78.71 ± 8.53           | 79.64 ± 8.69            | 79.94 ± 8.55           | 0.001    |
| Systolic blood pressure (mm Hg)  | 120.50 ± 16.33        | 119.30 ± 16.02         | 119.53 ± 17.01          | 120.41 ± 17.38         | 0.304    |
| Diastolic blood pressure (mm Hg) | 78.41 ± 10.35         | 77.67 ± 10.25          | 77.31 ± 11.25           | 77.66 ± 11.17          | 0.182    |
| Physical activity (MET-MIN/day)  | 608.14 (0.00-1645.71) | 1024.50 (0.00-2057.14) | 1146.64 (0.00-2214.86)  | 1164.86 (0.00-2331.43) | <0.001   |
| Smoking, n (%)                   |                       |                        |                         |                        |          |
| Yes                              | 252 (28.25)           | 354 (34.57)            | 381 (34.76)             | 378 (35.36)            | 0.003    |
| No                               | 640 (71.75)           | 670 (65.43)            | 715 (65.24)             | 691 (64.64)            |          |

|                                 |                        |                        |                        |                        |        |
|---------------------------------|------------------------|------------------------|------------------------|------------------------|--------|
| Alcohol drinking, n (%)         |                        |                        |                        |                        |        |
| Yes                             | 245 (33.98)            | 348 (33.98)            | 405 (37.05)            | 392 (36.67)            | <0.001 |
| No                              | 648 (66.02)            | 676 (66.02)            | 688 (62.95)            | 677 (63.33)            |        |
| Educational level, n (%)        |                        |                        |                        |                        |        |
| Primary school or below         | 388 (43.35)            | 463 (45.30)            | 529 (48.49)            | 554 (51.92)            | 0.012  |
| Junior high school              | 314 (35.08)            | 345 (33.76)            | 369 (33.82)            | 309 (28.96)            |        |
| Senior high school              | 126 (14.08)            | 142 (13.89)            | 122 (11.18)            | 135 (12.65)            |        |
| College and above               | 67 (7.49)              | 72 (7.05)              | 71 (6.51)              | 69 (6.47)              |        |
| Regions, n (%)                  |                        |                        |                        |                        |        |
| Urban                           | 307 (33.48)            | 283 (27.53)            | 286 (26.02)            | 242 (22.60)            | <0.001 |
| Rural                           | 610 (66.52)            | 745 (72.47)            | 813 (73.98)            | 829 (77.40)            |        |
| Total energy intake (kcal/day)  | 1888.35 ± 529.72       | 2132.15 ± 538.02       | 2293.56 ± 572.15       | 2484.81 ± 595.70       | <0.001 |
| Total carbohydrate intake (g/d) | 269.64 ± 79.60         | 317.03 ± 82.71         | 341.98 ± 100.38        | 378.20 ± 108.20        | <0.001 |
| Total protein intake (g/d)      | 55.45 ± 18.09          | 62.33 ± 18.69          | 69.03 ± 19.89          | 76.81 ± 25.01          | <0.001 |
| Total fatty intake (g/d)        | 63.45 ± 33.61          | 65.54 ± 34.84          | 68.39 ± 34.28          | 71.11 ± 37.38          | <0.001 |
| Na intake (mg/d)                | 186.78 (107.43-341.19) | 266.29 (156.50-513.93) | 366.08 (171.43-757.17) | 375.46 (177.40-792.19) | <0.001 |
| Whole-grain fiber intake (g/d)  | 0.37 ± 0.81            | 0.70 ± 1.26            | 1.18 ± 2.00            | 2.52 ± 5.58            | <0.001 |
| Legume fiber intake (g/d)       | 0.11 ± 0.31            | 0.32 ± 0.75            | 0.77 ± 1.56            | 2.56 ± 5.51            | <0.001 |
| Vegetable fiber intake (g/d)    | 1.99 ± 0.96            | 3.37 ± 1.32            | 4.83 ± 2.37            | 11.04 ± 9.62           | <0.001 |
| Fruit fiber intake (g/d)        | 0.08 ± 0.31            | 0.20 ± 0.58            | 0.36 ± 0.92            | 0.46 ± 1.37            | <0.001 |

Descriptive analyses of continuous variables were conducted by means ± standard deviations (SD) or medians (interquartile range), and categorical variables were described by number (percentage). Analysis of variance or Kruskal-Wallis test was used for continuous variables, and chi square test was used for categorical variables. BMI: body mass index.

**Table S3 Characteristics of the study population at inclusion in the CVD cohort, according to quartiles of total dietary fiber intakes.**

| Characteristics                 | Fiber intake (g/d)    |                        |                         |                        | <i>p</i> |
|---------------------------------|-----------------------|------------------------|-------------------------|------------------------|----------|
|                                 | Quartile 1 (<6.21)    | Quartile 2 (6.21-8.82) | Quartile 3 (8.82-13.53) | Quartile 4 (>13.53)    |          |
| Number                          | 1116                  | 1233                   | 1284                    | 1299                   |          |
| Age (years)                     | 46.68 ± 13.58         | 46.38 ± 12.62          | 46.93 ± 12.51           | 47.16 ± 12.54          | 0.468    |
| Male, n (%)                     | 458 (41.94)           | 572 (46.66)            | 624 (48.90)             | 670 (51.74)            | <0.001   |
| BMI (kg/m <sup>2</sup> )        | 22.99 ± 3.33          | 23.06 ± 3.42           | 23.19 ± 3.14            | 23.16 ± 3.34           | 0.461    |
| Waist circumference (cm)        | 79.7 ± 9.85           | 80.41 ± 9.73           | 80.96 ± 9.51            | 81.36 ± 9.64           | 0.001    |
| Systolic blood pressure (mmHg)  | 121.64 ± 17.42        | 120.65 ± 16.61         | 121.11 ± 18.17          | 121.26 ± 17.56         | 0.632    |
| Diastolic blood pressure (mmHg) | 78.95 ± 10.67         | 78.60 ± 10.46          | 78.13 ± 11.72           | 78.28 ± 11.19          | 0.323    |
| Physical activity (MET-MIN/day) | 477.42 (0.00-1600.50) | 1006.29 (0.00-2046.00) | 1131.43 (0.00-2183.14)  | 1164.43 (0.00-2317.71) | <0.001   |
| Smoking, n (%)                  |                       |                        |                         |                        |          |
| Yes                             | 307 (28.22)           | 415 (33.77)            | 449 (35.05)             | 451 (34.83)            | 0.002    |
| No                              | 781 (71.78)           | 814 (66.23)            | 832 (64.95)             | 844 (65.17)            |          |
| Alcohol drinking, n (%)         |                       |                        |                         |                        |          |
| Yes                             | 303 (27.80)           | 414 (33.69)            | 476 (37.25)             | 482 (37.16)            | <0.001   |
| No                              | 787 (72.20)           | 815 (66.31)            | 802 (62.75)             | 815 (62.84)            |          |
| Educational level, n (%)        |                       |                        |                         |                        |          |
| Primary school or below         | 474 (43.41)           | 553 (45.11)            | 615 (48.24)             | 671 (51.81)            | 0.003    |
| Junior high school              | 370 (33.88)           | 417 (34.01)            | 429 (33.65)             | 384 (29.65)            |          |
| Senior high school              | 164 (15.02)           | 167 (13.62)            | 145 (11.37)             | 160 (12.36)            |          |
| College and above               | 84 (7.69)             | 89 (7.26)              | 86 (6.75)               | 80 (6.18)              |          |
| Regions, n (%)                  |                       |                        |                         |                        |          |
| Urban                           | 384 (34.41)           | 355 (28.79)            | 343 (26.71)             | 295 (22.71)            | <0.001   |
| Rural                           | 732 (65.59)           | 878 (71.21)            | 941 (73.29)             | 1004 (77.29)           | <0.001   |
| Total energy intake (kcal/day)  | 1870.58 ± 532.14      | 2117.39 ± 546.16       | 2291.21 ± 570.91        | 2501.04 ± 595.38       | <0.001   |

|                                 |                        |                        |                        |                        |        |
|---------------------------------|------------------------|------------------------|------------------------|------------------------|--------|
| Total carbohydrate intake (g/d) | 267.42 ± 79.49         | 314.35 ± 84.58         | 341.25 ± 100.99        | 382.00 ± 108.63        | <0.001 |
| Total protein intake (g/d)      | 55.13 ± 18.03          | 62.09 ± 18.93          | 69.17 ± 34.64          | 77.57 ± 25.34          | <0.001 |
| Total fatty intake (g/d)        | 62.74 ± 33.16          | 65.46 ± 34.59          | 68.44 ± 34.64          | 70.94 ± 37.15          |        |
| Na intake (mg/d)                | 183.47 (107.19-342.09) | 267.84 (154.73-521.22) | 375.58 (173.26-757.01) | 384.31 (183.99-796.31) | <0.001 |
| Whole-grain fiber intake (g/d)  | 0.37 ± 0.81            | 0.70 ± 1.26            | 1.18 ± 2.00            | 2.52 ± 5.58            | <0.001 |
| Legume fiber intake (g/d)       | 0.11 ± 0.31            | 0.32 ± 0.75            | 0.77 ± 1.56            | 2.56 ± 5.51            | <0.001 |
| Vegetable fiber intake (g/d)    | 1.99 ± 0.96            | 3.37 ± 1.32            | 4.83 ± 2.37            | 11.04 ± 9.62           | <0.001 |
| Fruit fiber intake (g/d)        | 0.08 ± 0.31            | 0.20 ± 0.58            | 0.36 ± 0.92            | 0.46 ± 1.37            | <0.001 |

Descriptive analyses of continuous variables were conducted by means ± standard deviations (SD) or medians (interquartile range), and categorical variables were described by number (percentage). Analysis of variance or Kruskal-Wallis test was used for continuous variables, and chi square test was used for categorical variables. BMI: body mass index.

**Table S4 Characteristics of the study population at inclusion in the all-cause mortality cohort, according to quartiles of total dietary fiber intakes.**

| Characteristics                 | Fiber intake (g/d)    |                        |                         |                       | <i>p</i> |
|---------------------------------|-----------------------|------------------------|-------------------------|-----------------------|----------|
|                                 | Quartile 1 (<6.21)    | Quartile 2 (6.21-8.81) | Quartile 3 (8.81-13.53) | Quartile 4 (>13.53)   |          |
| Number                          | 2018                  | 2082                   | 2106                    | 2101                  |          |
| Age (years)                     | 48.38 ± 15.99         | 47.05 ± 14.15          | 47.52 ± 14.11           | 48.04 ± 13.97         | 0.019    |
| Male, n (%)                     | 835 (42.15)           | 975 (47.17)            | 1045 (49.98)            | 1096 (52.44)          | <0.001   |
| BMI (kg/m <sup>2</sup> )        | 22.96 ± 3.38          | 23.09 ± 3.43           | 23.24 ± 3.28            | 23.14 ± 3.27          | 0.067    |
| Waist circumference(cm)         | 80.29 ± 10.17         | 80.69 ± 9.89           | 81.50 ± 9.88            | 81.38 ± 9.52          | 0.001    |
| Systolic blood pressure (mmHg)  | 123.06 ± 18.69        | 121.76 ± 17.69         | 122.46 ± 19.01          | 121.77 ± 18.20        | 0.096    |
| Diastolic blood pressure (mmHg) | 79.39 ± 11.05         | 78.81 ± 10.74          | 78.90 ± 12.20           | 78.26 ± 11.06         | 0.025    |
| Physical activity (MET-MIN/day) | 240.00 (0.00-1440.00) | 848.57 (0.00-1920.00)  | 960.00 (0.00-2019.00)   | 993.00 (0.00-2123.14) | <0.001   |
| Smoking, n (%)                  |                       |                        |                         |                       | <0.0001  |
| Yes                             | 580 (29.34)           | 674 (32.56)            | 731 (34.86)             | 742 (35.49)           |          |

|                                 |                        |                        |                        |                        |        |
|---------------------------------|------------------------|------------------------|------------------------|------------------------|--------|
| No                              | 1397 (70.66)           | 1396 (67.44)           | 1366 (65.14)           | 1349 (64.51)           |        |
| Alcohol drinking, n (%)         |                        |                        |                        |                        | <0.001 |
| Yes                             | 547 (27.70)            | 677 (32.69)            | 750 (35.82)            | 764 (36.52)            |        |
| No                              | 1428 (72.30)           | 1394 (67.31)           | 1344 (64.18)           | 1328 (63.48)           |        |
| Educational level, n (%)        |                        |                        |                        |                        | 0.005  |
| Primary school or below         | 860 (43.41)            | 895 (43.30)            | 948 (45.36)            | 1038 (49.67)           |        |
| Junior high school              | 621 (31.35)            | 675 (32.66)            | 675 (32.30)            | 625 (29.90)            |        |
| Senior high school              | 301 (15.19)            | 281 (13.59)            | 261 (12.49)            | 256 (12.25)            |        |
| College and above               | 199 (10.05)            | 216 (10.45)            | 206 (9.86)             | 171 (8.18)             |        |
| Regions, n (%)                  |                        |                        |                        |                        | <0.001 |
| Urban                           | 813 (40.29)            | 718 (34.49)            | 673 (31.96)            | 580 (27.61)            |        |
| Rural                           | 1205 (59.71)           | 1364 (65.51)           | 1433 (68.04)           | 1521 (72.39)           |        |
| Total energy intake (kcal/day)  | 1838.92 ± 554.39       | 2107.11 ± 552.19       | 2271.51 ± 584.61       | 2461.00 ± 612.32       | <0.001 |
| Total carbohydrate intake (g/d) | 257.22 ± 80.55         | 307.56 ± 86.11         | 334.24 ± 99.91         | 372.66 ± 110.49        | <0.001 |
| Total protein intake (g/d)      | 54.78 ± 19.26          | 62.44 ± 19.56          | 68.92 ± 20.82          | 76.59 ± 25.58          | <0.001 |
| Total fatty intake (g/d)        | 63.69 ± 35.56          | 67.45 ± 35.91          | 69.97 ± 36.78          | 71.18 ± 37.91          | <0.001 |
| Na intake (mg/d)                | 181.35 (101.98-338.71) | 271.27 (150.60-516.51) | 373.92 (175.57-749.91) | 385.27 (183.29-802.64) | <0.001 |
| Whole-grain fiber intake (g/d)  | 0.37 ± 0.80            | 0.74 ± 1.26            | 1.19 ± 2.01            | 2.57 ± 5.55            | <0.001 |
| Legume fiber intake (g/d)       | 0.11 ± 0.32            | 0.30 ± 0.74            | 0.80 ± 1.56            | 2.56 ± 5.52            | <0.001 |
| Vegetable fiber intake (g/d)    | 2.01 ± 0.96            | 3.34 ± 1.32            | 4.85 ± 2.37            | 11.08 ± 9.62           | <0.001 |
| Fruit fiber intake (g/d)        | 0.07 ± 0.31            | 0.20 ± 0.59            | 0.36 ± 0.92            | 0.44 ± 1.37            | <0.001 |

Descriptive analyses of continuous variables were conducted by means ± standard deviations (SD) or medians (interquartile range), and categorical variables were described by number (percentage). Analysis of variance or Kruskal-Wallis test was used for continuous variables, and chi square test was used for categorical variables. BMI: body mass index.
